# Supplementary material
Source: ML conference proceedings conference paper supplement (https://proceedings.mlr.press/v97/adel19a.html)
Supplement: Supplementary file [file adel19a-supp.pdf]

---

# Supplementary material for: TibGM: A Transferable and Information-Based Graphical Model Approach for Reinforcement Learning

---

Tameem Adel<sup>1</sup> Adrian Weller<sup>1,2</sup>

## 7. Implementation Details

Whenever feasible, and for the sake of comparing on common grounds, we have tried to imitate the hyperparameter settings of (Haarnoja et al., 2018b) and (Haarnoja et al., 2018a). After each learning iteration of the TibGM stochastic policy, the learnt policy is embedded along with the dynamics. The dynamics are sampled from the sample-efficient off-policy soft actor-critic (SAC Haarnoja et al., 2018b). Hyperparameter values are displayed in Tables 2 and 3.

Table 2. Shared hyperparameter values.

| Parameter                        | Value                                  |
|----------------------------------|----------------------------------------|
| replay buffer size               | $10^6$                                 |
| Training began after collecting: | 2,000 samples                          |
| encoder                          | 2-hidden layer NN with 512 ReLUs, each |
| decoder                          | 2-hidden layer NN with 512 ReLUs, each |
| dimension of $\mathbf{z}$        | 256                                    |
| dimension of $\mathbf{h}_t$      | 128                                    |
| optimizer                        | Adam (Kingma & Ba, 2015)               |
| learning rate                    | $3 \cdot 10^{-4}$                      |
| batch size                       | 128                                    |
| discount                         | 0.99                                   |

Table 3. Benchmark specific hyperparameter values.

| Parameter        | Swimmer | Hopper | Walker2d | HalfCheetah | Ant | Humanoid |
|------------------|---------|--------|----------|-------------|-----|----------|
| reward scale     | 100     | 1      | 3        | 1           | 3   | 3        |
| action dimension | 2       | 3      | 6        | 6           | 8   | 21       |
| state dimension  | 4       | 6      | 12       | 12          | 16  | 42       |

Regarding normalizing flows (NFs), in addition to Sylvester normalizing flows (SNFs, van den Berg et al., 2018), we performed some initial experiments using alternative NF formulations, namely vanilla planar NFs, radial NFs and inverse auto-regressive NFs. SNFs considerably outperformed all the other types of NFs.

In Section 5.1 and Figure 2 of the main document, we showed how ExTibGM and TibGM achieve better results than the baselines based on the number of time steps (the x-axis). Comparisons in terms of wall-clock run-time lead to very

---

<sup>1</sup>Department of Engineering, University of Cambridge, UK <sup>2</sup>The Alan Turing Institute, UK. Correspondence to: Tameem Adel <tah47@cam.ac.uk>.

similar results. In Table 4, we show a highlight of these comparisons with LSP (most relevant since it is also latent-space, PGM-based) by listing the return values after a specific number of minutes (100 minutes):

Table 4. Total expected return on 6 benchmark tasks after 100 wall-clock minutes.

| Task / Algorithm | <b>TibGM</b> | <b>ExTibGM</b> | LSP   |
|------------------|--------------|----------------|-------|
| Swimmer          | 1019         | 1542           | 351   |
| Hopper           | 2217         | 2922           | 2178  |
| Walker2d         | 4910         | 4869           | 3184  |
| HalfCheetah      | 15290        | 16187          | 12093 |
| Ant              | 5109         | 6055           | 3921  |
| Humanoid         | 7823         | 8318           | 5596  |

Overall, ExTibGM and TibGM do significantly better (in 6 and 5 tasks, respectively).

## References

- Haarnoja, T., Hartikainen, K., Abbeel, P., and Levine, S. Latent space policies for hierarchical reinforcement learning. *International Conference on Machine Learning (ICML)*, 2018a.
- Haarnoja, T., Zhou, A., Abbeel, P., and Levine, S. Soft actor-critic: Off-policy maximum entropy deep reinforcement learning with a stochastic actor. *International Conference on Machine Learning (ICML)*, 2018b.
- Kingma, D. and Ba, J. Adam: A Method for Stochastic Optimization. *International Conference on Learning Representations (ICLR)*, 2015.
- van den Berg, R., Hasenclever, L., Tomczak, J., and Welling, M. Sylvester normalizing flows for variational inference. *Uncertainty in Artificial Intelligence (UAI)*, 2018.
